# Supplementary material for: Synergistic Effect of Surface Acidity and PtOx Catalyst on the Sensitivity of Nanosized Metal–Oxide Semiconductors to Benzene
Source: MDPI journal article supplement (doi:10.3390/s22176520), 2022-08-29
Supplement: s1 [file s1]

## Supplementary data

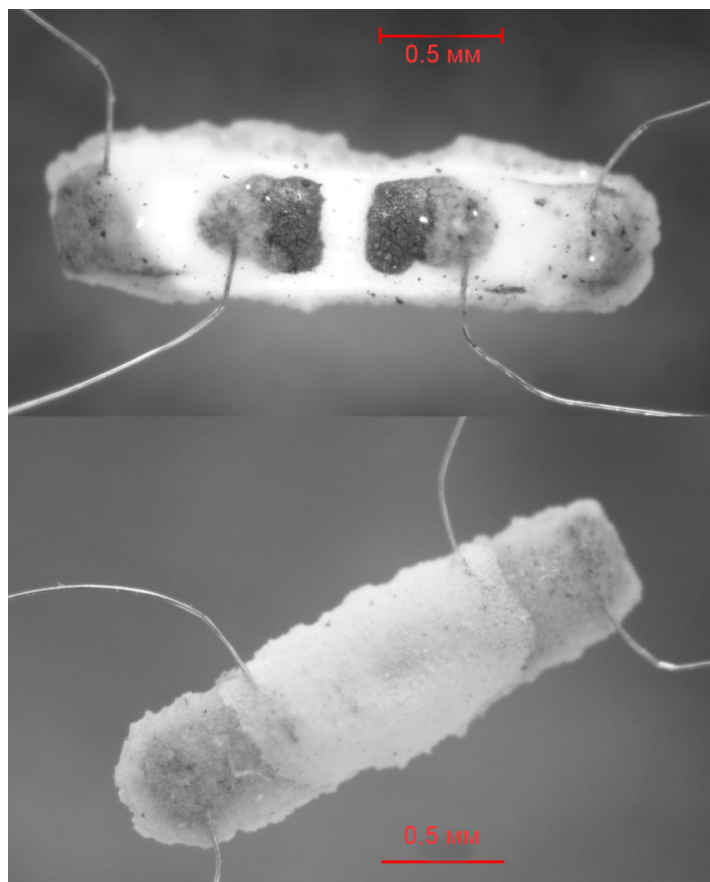

**Figure S1.** Microscope images of sensor substrate before (top) and after (bottom) thick film deposition.

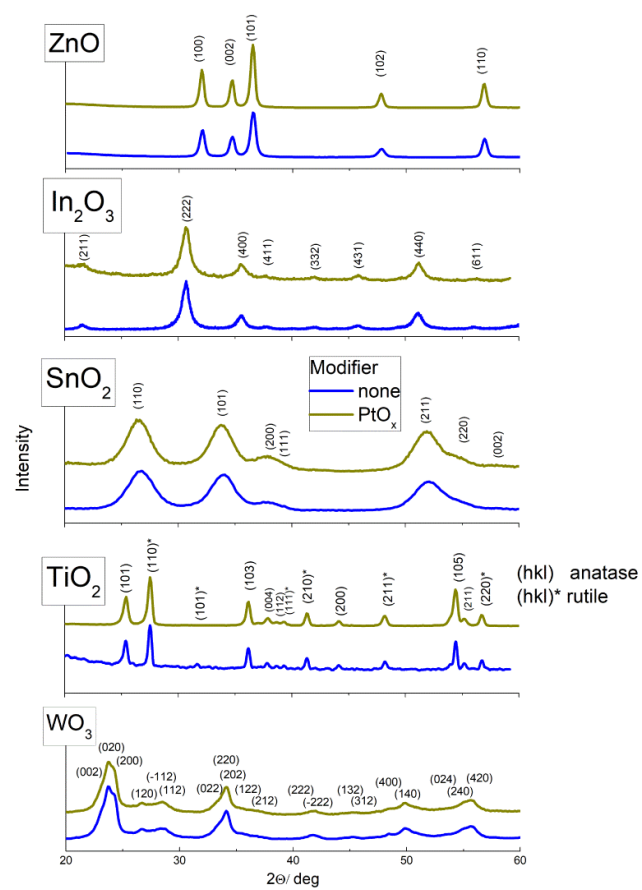

**Figure S2.** XRD patterns of MOS and MOS/PtO<sub>x</sub> samples.

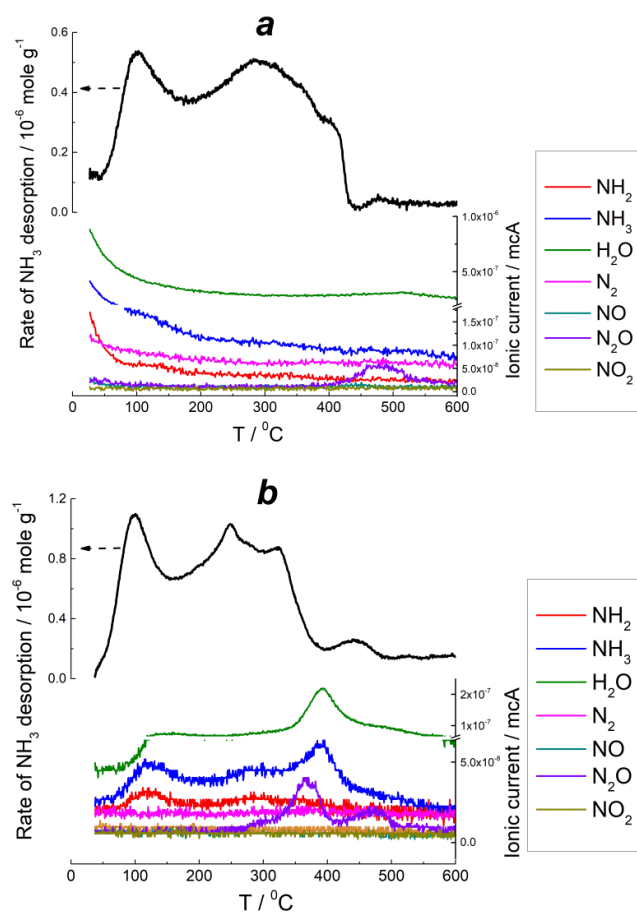

**Figure S3.** Patterns of ammonia TPD from the surface of MOS (thermal conductivity detector, TCD) and mass-spectrometric analysis (MS) of desorbed gas.

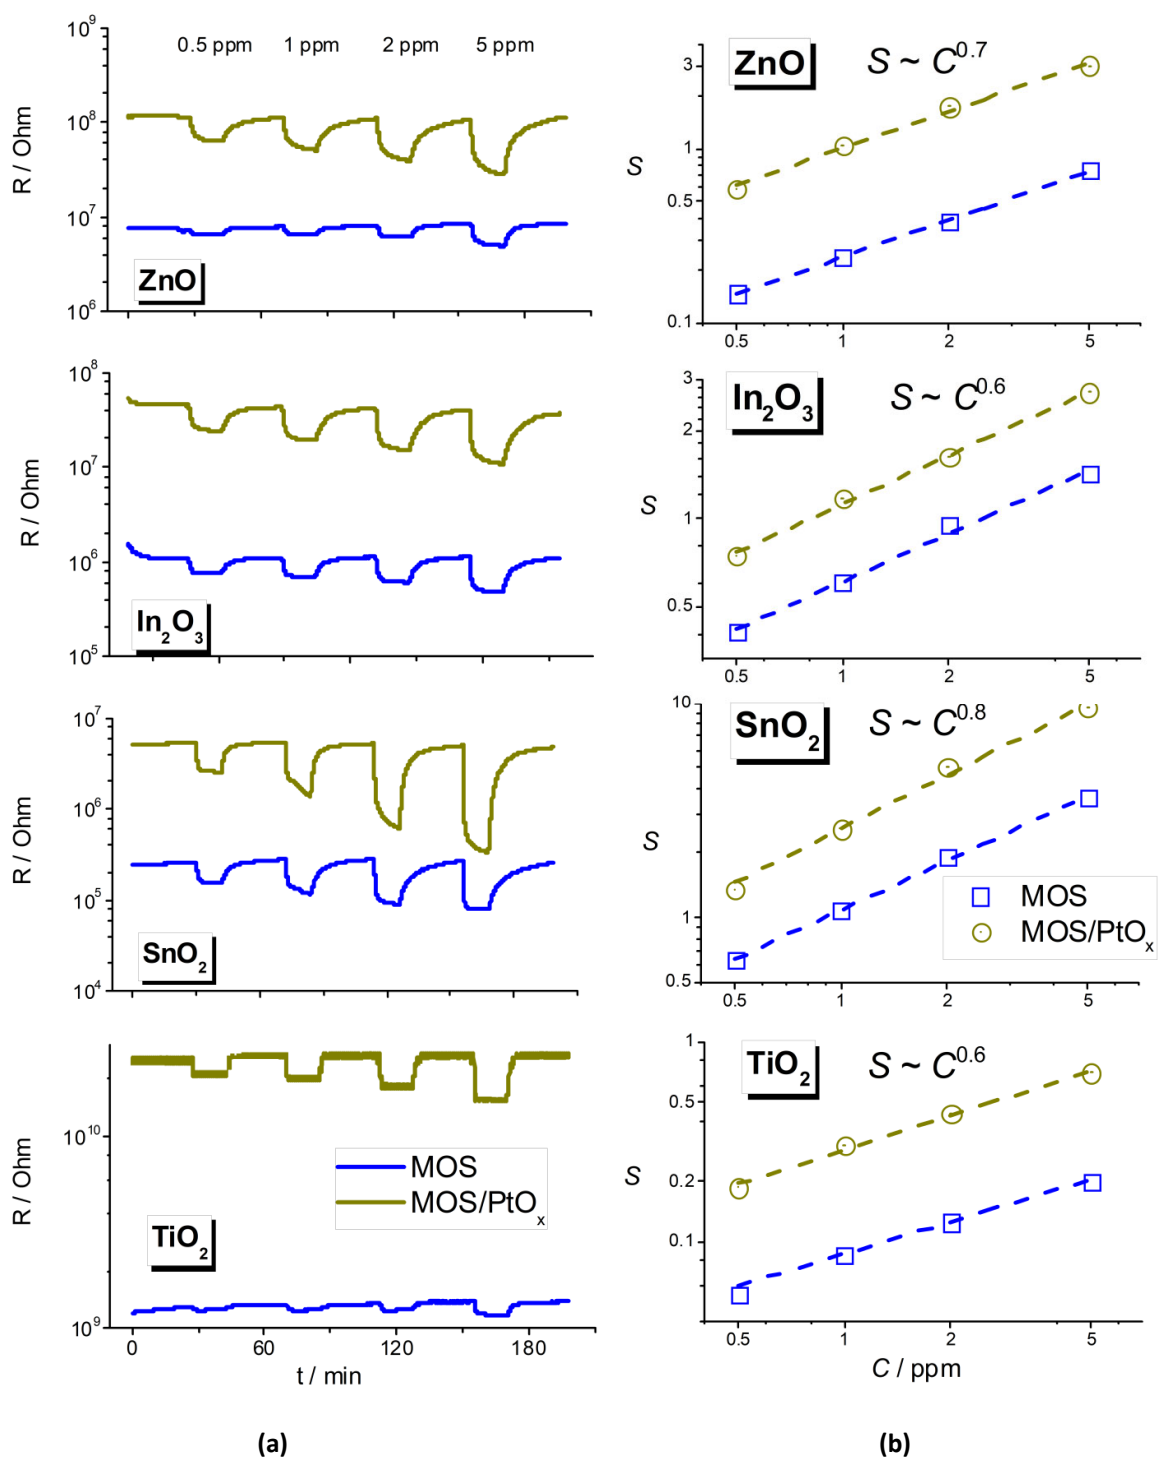

**Figure S4.** Dynamic response of pristine and PtO<sub>x</sub>-modified ZnO, In<sub>2</sub>O<sub>3</sub>, SnO<sub>2</sub>, and TiO<sub>2</sub> to 0.5–5 ppm benzene at 220 °C (a), sensor signals in relation to benzene concentration at 220 °C (b).
